# Supplementary material for: Parallel body shape divergence in the Neotropical fish genus Rhoadsia (Teleostei: Characidae) along elevational gradients of the western slopes of the Ecuadorian Andes
Source: PLoS One. 2017 Jun 28;12(6):e0179432. doi: 10.1371/journal.pone.0179432 (PMC5489170; doi:10.1371/journal.pone.0179432)
Supplement: S4 Table — COI gene below diagonal, S7i2 gene above diagonal. Significant FST values in bold with asterisks indicating the level of significance. (DOC) [file pone.0179432.s008.doc]

S4 Table. Pairwise FST values between samples. COI gene below diagonal, Si72 gene above diagonal. Significant FST values in bold with asterisks indicating the level of significance.

E1 E3 E4 E5 E6 E7 E8 J1 J3 J4 J5 GO1 GO2 SR

E1 - **0.851***** **0.861***** X **0.584*** 0.381*** 0.861*** 0.160* 0.816***** NA 0.001 **0.251**** 0.064 0.031

E3 0.091 - 0.000 X **0.267* 0.634***** 0.000 **0.861***** 0.000 NA **0.878*** 0.385*** 0.746*** 0.788*****

E4 0.000 0.134 - X **0.286* 0.654***** 0.000 **0.870***** 0.000 NA **0.886*** 0.406*** 0.759*** 0.800*****

E5 0.000 0.134 0.000 - NA NA NA NA NA NA NA NA NA NA

E6 0.000 0.163 0.000 0.000 - 0.13491 **0.286*** **0.660***** 0.172 NA **0.619*** 0.189* 0.437*** 0.487*****

E7 0.000 0.112 0.000 0.000 0.013 - **0.654***** **0.517*** 0.559***** NA **0.406*** 0.182* 0.144 0.229***

E8 **0.388* 0.364*** 0.440* 0.440* 0.490*** 0.408***** - **0.869***** 0.000 NA **0.886*** 0.406* 0.759*** 0.800*****

J1 **0.638*** 0.620*** 0.675*** 0.675*** 0.688*** 0.644*** 0.526**** - **0.836***** NA **0.197** 0.421*** 0.240** 0.223****

J3 **0.600*** 0.580*** 0.650*** 0.650*** 0.669*** 0.609*** 0.480** 0.182*** - NA **0.844*** 0.358*** 0.709*** 0.751*****

J4 **0.714*** 0.696*** 0.747*** 0.747*** 0.767*** 0.720*** 0.595*** 0.298***** 0.046 - NA NA NA NA

J5 **0.900*** 0.843*** 0.911*** 0.911*** 0.904*** 0.884*** 0.757*** 0.667***** **0.329*** 0.220 - **0.367***** 0.053 0.000

GO1 **0.614*** 0.579*** 0.641*** 0.641*** 0.669*** 0.620***** 0.009 **0.676*** 0.632*** 0.705*** 0.802***** - **0.254** 0.277*****

GO2 **0.495*** 0.471*** 0.526*** 0.526*** 0.556*** 0.507**** 0.000 **0.626*** 0.591*** 0.686*** 0.790***** 0.005 - 0.000

SR **0.794*** 0.737*** 0.811*** 0.811*** 0.795*** 0.779*** 0.664***** 0.132 **0.452** 0.601*** 0.832*** 0.762*** 0.707***** -

* P < 0.05, ** P < 0.01, *** P < 0.001
